# Supplementary material
Source: Research Square preprint supplement (doi:10.21203/rs.3.rs-9708759/v1)
Supplement: Supplementary file 1 [file 548d0ba87dd3b53c85fed7b0.docx]

S**upplementary Information**

Yuki Ogawa, Akihiko Kondo, Tomokazu Shirai

Table S1 (Lowercase letters indicate the mutation sites.)

| No | Primer name | Sequence (5′ to 3′ ) |
| --- | --- | --- |
| 1 | pCold-F | CTCGAGGGATCCGAATTCAA |
| 2 | pCold-R | CATATGCCTACCTTCGATAT |
| 3 | pCold-seq-F | CACGCCATATCGCCGAAAG |
| 4 | pCold-seq-R | GCAGGGATCTTAGATTCTGTGC |
| 5 | YADH-T45A-F | ATAGCGGTGTTTGTCATgccGATCTGCATGCATGGCAT |
| 6 | YADH-T45-R | GACAAACACCGCTATATTTCAC |
| 7 | YADH-W54A-F | GCATGGCATGGTGATgcaCCTCTGCCGGTTAAACTG |
| 8 | YADH-W54-R | ATCACCATGCCATGCATGCAG |
| 9 | YADH-L56A-F | CATGGTGATTGGCCTgcgCCGGTTAAACTGCCGCTG |
| 10 | YADH-L56-R | AGGCCAATCACCATGCCATG |
| 11 | YADH-W92A-F | TACGCAGGTATTAAAgcaCTGAATGGTAGCTGTATG |
| 12 | YADH-W92-R | TTTAATACCTGCGTAATCAC |
| 13 | YADH-Y119A-F | GCCGATCTGAGCGGTgcaACCCATGATGGTAGCTTT |
| 14 | YADH-Y119-R | ACCGCTCAGATCGGCATGCG |
| 15 | YADH-M270A-F | ACCGTTCTGGTTGGTgcaCCTGCCGGTGCAAAATGT |
| 16 | YADH-M270-R | ACCAACCAGAACGGTGGTGC |
| 17 | YADH-Y294A-F | AGCATTGTTGGTAGCgcaGTTGGTAATCGTGCAGAT |
| 18 | YADH-Y294-R | GCTACCAACAATGCTAATGC |
| 19 | YADH-V295A-F | ATTGTTGGTAGCTATgcaGGTAATCGTGCAGATACC |
| 20 | YADH-V295-R | ATAGCTACCAACAATGCTAA |
| 21 | YADH-W54NNT-F | GCATGGCATGGTGATnntCCTCTGCCGGTTAAACTG |
| 22 | YADH-W54CMC-F | GCATGGCATGGTGATcmcCCTCTGCCGGTTAAACTG |
| 23 | YADH-W54AMG-F | GCATGGCATGGTGATamgCCTCTGCCGGTTAAACTG |
| 24 | YADH-W54GAC-F | GCATGGCATGGTGATgacCCTCTGCCGGTTAAACTG |
| 25 | YADH-W54CNS-F | GCATGGCATGGTGATcnsCCTCTGCCGGTTAAACTG |
| 26 | YADH-W54ANS-F | GCATGGCATGGTGATansCCTCTGCCGGTTAAACTG |
| 27 | YADH-W54GAS-F | GCATGGCATGGTGATgasCCTCTGCCGGTTAAACTG |
| 28 | YADH-W54V-F | GCATGGCATGGTGATgttCCTCTGCCGGTTAAACTG |
| 29 | YADH-W54CWG-F | GCATGGCATGGTGATkgbCCTCTGCCGGTTAAACTG |
| 30 | YADH-W54H-F | GCATGGCATGGTGATcacCCTCTGCCGGTTAAACTG |
| 31 | YADH-W54I-F | GCATGGCATGGTGATatcCCTCTGCCGGTTAAACTG |
| 32 | YADH-W54G-F | GCATGGCATGGTGATggcCCTCTGCCGGTTAAACTG |
| 33 | YADH-W54-R | ATCACCATGCCATGCATGCA |
| 34 | YADH-W54I-F | GCATGGCATGGTGATattCCTCTGCCGGTTAAACTG |
| 35 | YADH-W54V-F | GCATGGCATGGTGATgtgCCTCTGCCGGTTAAACTG |
| 36 | YADH-W54Y-F | GCATGGCATGGTGATtatCCTCTGCCGGTTAAACTG |
| 37 | YADH-W54H-F | GCATGGCATGGTGATcatCCTCTGCCGGTTAAACTG |
| 38 | YADH-W54F-F | GCATGGCATGGTGATtttCCTCTGCCGGTTAAACTG |
| 39 | YADH-W54A-F | GCATGGCATGGTGATgcgCCTCTGCCGGTTAAACTG |
| 40 | YADH-W54W-F | GCATGGCATGGTGATtggCCTCTGCCGGTTAAACTG |
| 41 | YADH-W54ACT-F | GCATGGCATGGTGATactCCTCTGCCGGTTAAACTG |
| 42 | YADH-W92NNT-F | TACGCAGGTATTAAAnntACTGAATGGTAGCTGTATG |
| 43 | YADH-W92TVC-F | TACGCAGGTATTAAAtvcACTGAATGGTAGCTGTATG |
| 44 | YADH-W92CNS-F | TACGCAGGTATTAAAcnsACTGAATGGTAGCTGTATG |
| 45 | YADH-W92ANS-F | TACGCAGGTATTAAAansACTGAATGGTAGCTGTATG |
| 46 | YADH-W92GWS-F | TACGCAGGTATTAAAgwsACTGAATGGTAGCTGTATG |
| 47 | YADH-W92NNT-F | TACGCAGGTATTAAAnntCTGAATGGTAGCTGTATG |
| 48 | YADH-W92TVC-F | TACGCAGGTATTAAAtvcCTGAATGGTAGCTGTATG |
| 49 | YADH-W92CNS-F | TACGCAGGTATTAAAcnsCTGAATGGTAGCTGTATG |
| 50 | YADH-W92ANS-F | TACGCAGGTATTAAAansCTGAATGGTAGCTGTATG |
| 51 | YADH-W92GWS-F | TACGCAGGTATTAAAgwsCTGAATGGTAGCTGTATG |
| 52 | YADH-W92TWC-F | TACGCAGGTATTAAAtwcCTGAATGGTAGCTGTATG |
| 53 | YADH-W92CWS-F | TACGCAGGTATTAAAcwsCTGAATGGTAGCTGTATG |
| 54 | YADH-W92AHC-F | TACGCAGGTATTAAAahcCTGAATGGTAGCTGTATG |
| 55 | YADH-W92GRS-F | TACGCAGGTATTAAAgrsCTGAATGGTAGCTGTATG |
| 56 | YADH-W92YAC-F | TACGCAGGTATTAAAyacCTGAATGGTAGCTGTATG |
| 57 | YADH-W92GAS-F | TACGCAGGTATTAAAgasCTGAATGGTAGCTGTATG |
| 58 | YADH-W92ATC-F | TACGCAGGTATTAAAatcCTGAATGGTAGCTGTATG |
| 59 | YADH-W92Y-F | TACGCAGGTATTAAAtacCTGAATGGTAGCTGTATG |
| 60 | YADH-W92H-F | TACGCAGGTATTAAAcacCTGAATGGTAGCTGTATG |
| 61 | YADH-W92D-F | TACGCAGGTATTAAAgacCTGAATGGTAGCTGTATG |
| 62 | YADH-W92M-F | TACGCAGGTATTAAAatgCTGAATGGTAGCTGTATG |
| 63 | YADH-W92F-F | TACGCAGGTATTAAAtttCTGAATGGTAGCTGTATG |
| 64 | YADH-W92W-F | TACGCAGGTATTAAAtggCTGAATGGTAGCTGT |
| 65 | YADH-Y119NNT-F | GCCGATCTGAGCGGTnntACCCATGATGGTAGCTTT |
| 66 | YADH-Y119CHS-F | GCCGATCTGAGCGGTchsACCCATGATGGTAGCTTT |
| 67 | YADH-Y119AHA-F | GCCGATCTGAGCGGTahaACCCATGATGGTAGCTTT |
| 68 | YADH-Y119GAS-F | GCCGATCTGAGCGGTgasACCCATGATGGTAGCTTT |
| 69 | YADH-Y119TDC-F | GCCGATCTGAGCGGTtdcACCCATGATGGTAGCTTT |
| 70 | YADH-Y119W-F | GCCGATCTGAGCGGTtggACCCATGATGGTAGCTTT |
| 71 | YADH-Y119F-F | GCCGATCTGAGCGGTttcACCCATGATGGTAGCTTT |
| 72 | YADH-Y119N-F | GCCGATCTGAGCGGTaacACCCATGATGGTAGCTTT |
| 73 | YADH-Y119E-F | GCCGATCTGAGCGGTgagACCCATGATGGTAGCTTT |
| 74 | YADH-Y119M-F | GCCGATCTGAGCGGTatgACCCATGATGGTAGCTTT |
| 75 | YADH-Y119CMC-F | GCCGATCTGAGCGGTcmcACCCATGATGGTAGCTTT |
| 76 | YADH-Y119AYG-F | GCCGATCTGAGCGGTaygACCCATGATGGTAGCTTT |
| 77 | YADH-Y119H-F | GCCGATCTGAGCGGTcacACCCATGATGGTAGCTTT |
| 78 | YADH-Y119T-F | GCCGATCTGAGCGGTaccACCCATGATGGTAGCTTT |
| 79 | YADH-Y119FY-F | GCCGATCTGAGCGGTtwcACCCATGATGGTAGCTTT |
| 80 | YADH-Y119K-F | GCCGATCTGAGCGGTaaaACCCATGATGGTAGC |
| 81 | YADH-Y119V-F | GCCGATCTGAGCGGTgtgACCCATGATGGTAGC |
| 82 | YADH-Y119I-F | GCCGATCTGAGCGGTattACCCATGATGGTAGC |
| 83 | YADH-Y119G-F | GCCGATCTGAGCGGTggcACCCATGATGGTAGC |
| 84 | YADH-Y119C-F | GCCGATCTGAGCGGTtgcACCCATGATGGTAGCTTT |
| 85 | YADH-M270NNT-F | ACCGTTCTGGTTGGTnntCCTGCCGGTGCAAAATGT |
| 86 | YADH-M270TRS-F | ACCGTTCTGGTTGGTtrsCCTGCCGGTGCAAAATGT |
| 87 | YADH-M270CNS-F | ACCGTTCTGGTTGGTcnsCCTGCCGGTGCAAAATGT |
| 88 | YADH-M270ANS-F | ACCGTTCTGGTTGGTansCCTGCCGGTGCAAAATGT |
| 89 | YADH-M270GRG-F | ACCGTTCTGGTTGGTgrgCCTGCCGGTGCAAAATGT |
| 90 | YADH-M270CMC-F | ACCGTTCTGGTTGGTcmcCCTGCCGGTGCAAAATGT |
| 91 | YADH-M270AHW-F | ACCGTTCTGGTTGGTahwCCTGCCGGTGCAAAATGT |
| 92 | YADH-M270TAC-F | ACCGTTCTGGTTGGTtacCCTGCCGGTGCAAAATGT |
| 93 | YADH-M270AAG-F | ACCGTTCTGGTTGGTaagCCTGCCGGTGCAAAATGT |
| 94 | YADH-M270GGT-F | ACCGTTCTGGTTGGTggtCCTGCCGGTGCAAAATGT |
| 95 | YADH-M270V-F | ACCGTTCTGGTTGGTgtaCCTGCCGGTGCAAAATGT |
| 96 | YADH-M270I-F | ACCGTTCTGGTTGGTattCCTGCCGGTGCAAAATGT |
| 97 | YADH-M270N-F | ACCGTTCTGGTTGGTaacCCTGCCGGTGCAAAATGT |
| 98 | YADH-M270V-F | ACCGTTCTGGTTGGTgtgCCTGCCGGTGCAAAATGT |
| 99 | YADH-M270Y-F | ACCGTTCTGGTTGGTtatCCTGCCGGTGCAAAATGT |
| 100 | YADH-M270W-F | ACCGTTCTGGTTGGTtggCCTGCCGGTGCAAAA |
| 101 | YADH-M270M-F | ACCGTTCTGGTTGGTatgCCTGCCGGTGCAAAA |
| 102 | YADH-M270K-F | ACCGTTCTGGTTGGTaaaCCTGCCGGTGCAAAA |
| 103 | YADH-M270H-F | ACCGTTCTGGTTGGTcatCCTGCCGGTGCAAAA |
| 104 | YADH-M270T-F | ACCGTTCTGGTTGGTaccCCTGCCGGTGCAAAA |
| 105 | YADH-M270L-F | ACCGTTCTGGTTGGTttaCCTGCCGGTGCAAAA |
| 106 | YADH-Y294NNT-F | AGCATTGTTGGTAGCnntGTTGGTAATCGTGCAGAT |
| 107 | YADH-Y294MCG-F | AGCATTGTTGGTAGCmcgGTTGGTAATCGTGCAGAT |
| 108 | YADH-Y294T-F | AGCATTGTTGGTAGCaccGTTGGTAATCGTGCAGAT |
| 109 | YADH-Y294CNS-F | AGCATTGTTGGTAGCcnsGTTGGTAATCGTGCAGAT |
| 110 | YADH-Y294ANR-F | AGCATTGTTGGTAGCanrGTTGGTAATCGTGCAGAT |
| 111 | YADH-Y294TGG-F | AGCATTGTTGGTAGCtggGTTGGTAATCGTGCAGAT |
| 112 | YADH-Y294GWA-F | AGCATTGTTGGTAGCgwaGTTGGTAATCGTGCAGAT |
| 113 | YADH-Y294CMT-F | AGCATTGTTGGTAGCcmtGTTGGTAATCGTGCAGAT |
| 114 | YADH-Y294AMG-F | AGCATTGTTGGTAGCamgGTTGGTAATCGTGCAGAT |
| 115 | YADH-Y294NY-F | AGCATTGTTGGTAGCwacGTTGGTAATCGTGCAGAT |
| 116 | YADH-Y294C-F | AGCATTGTTGGTAGCtgcGTTGGTAATCGTGCAGAT |
| 117 | YADH-Y294H-F | AGCATTGTTGGTAGCcatGTTGGTAATCGTGCAGAT |
| 118 | YADH-Y294Y-F | AGCATTGTTGGTAGCtatGTTGGTAATCGTGCAGAT |


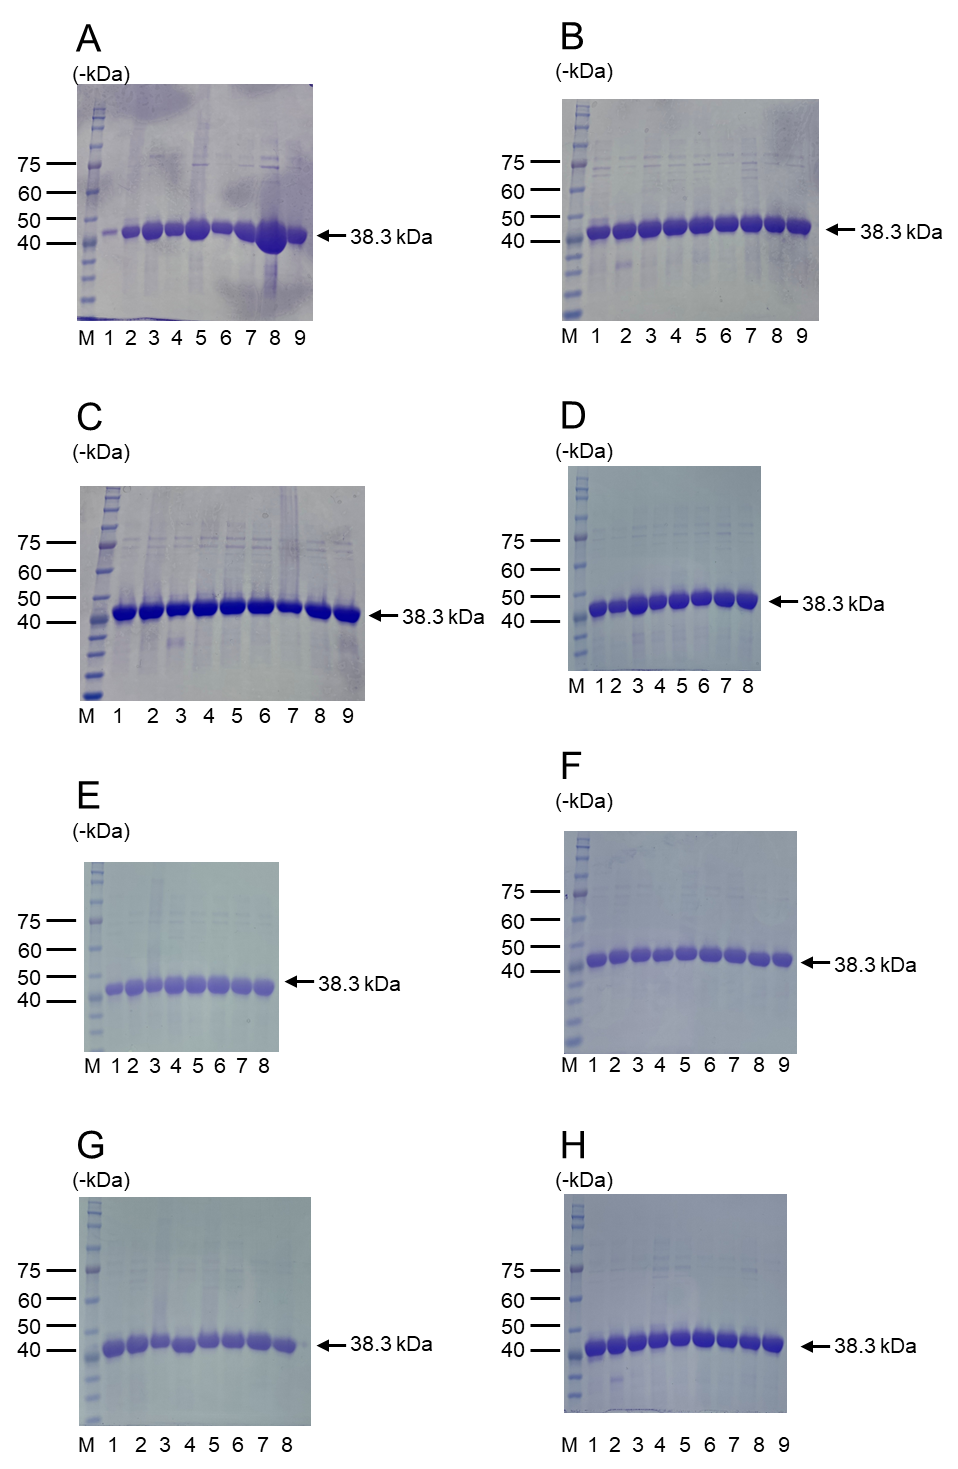

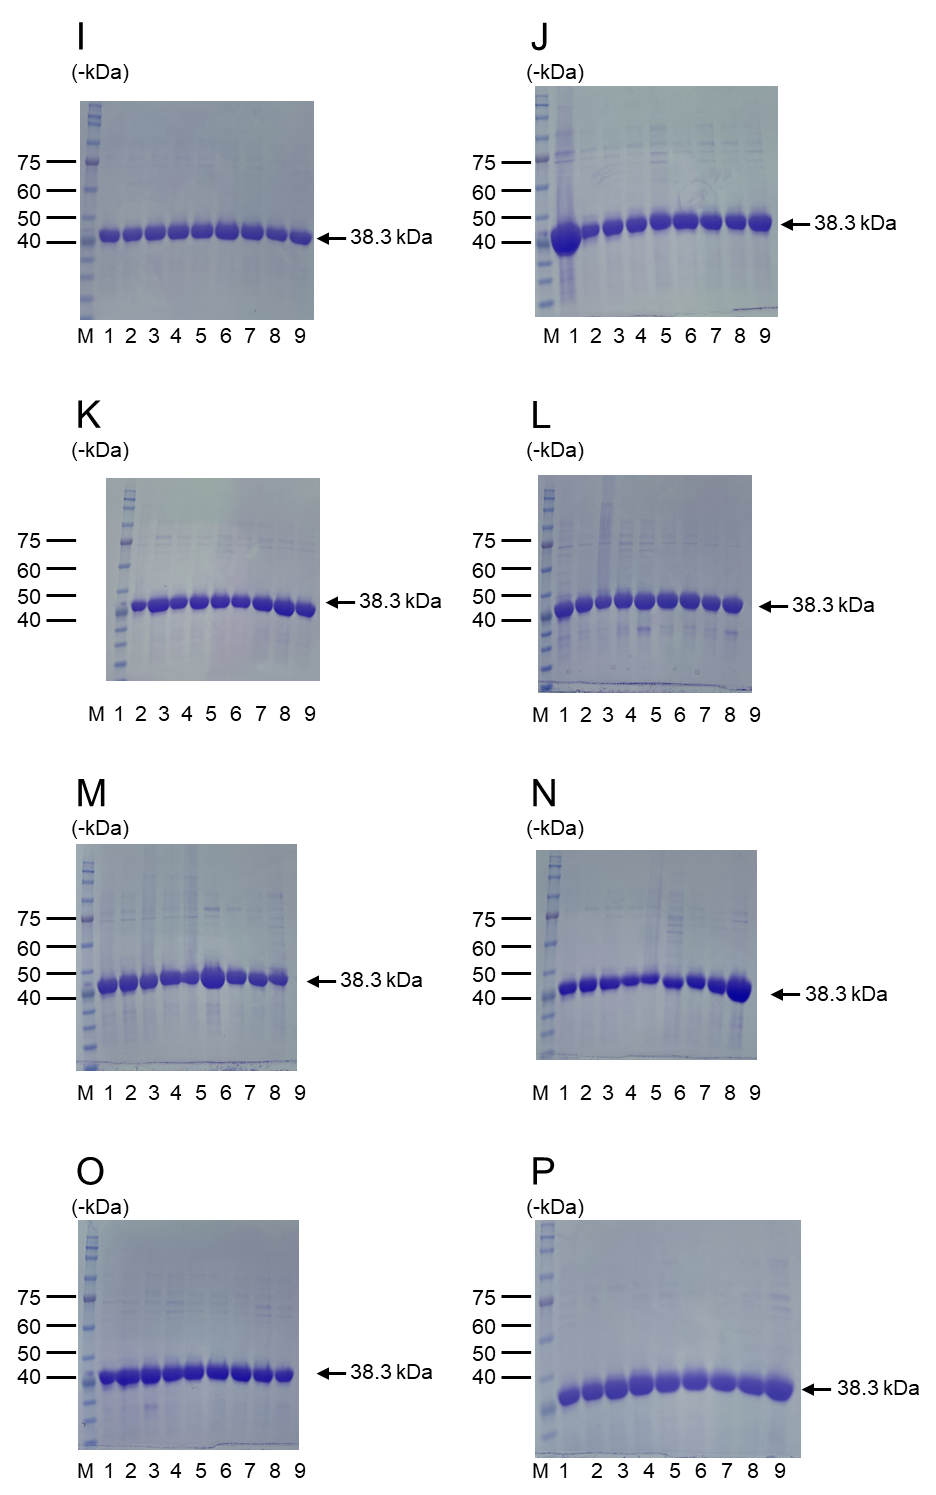

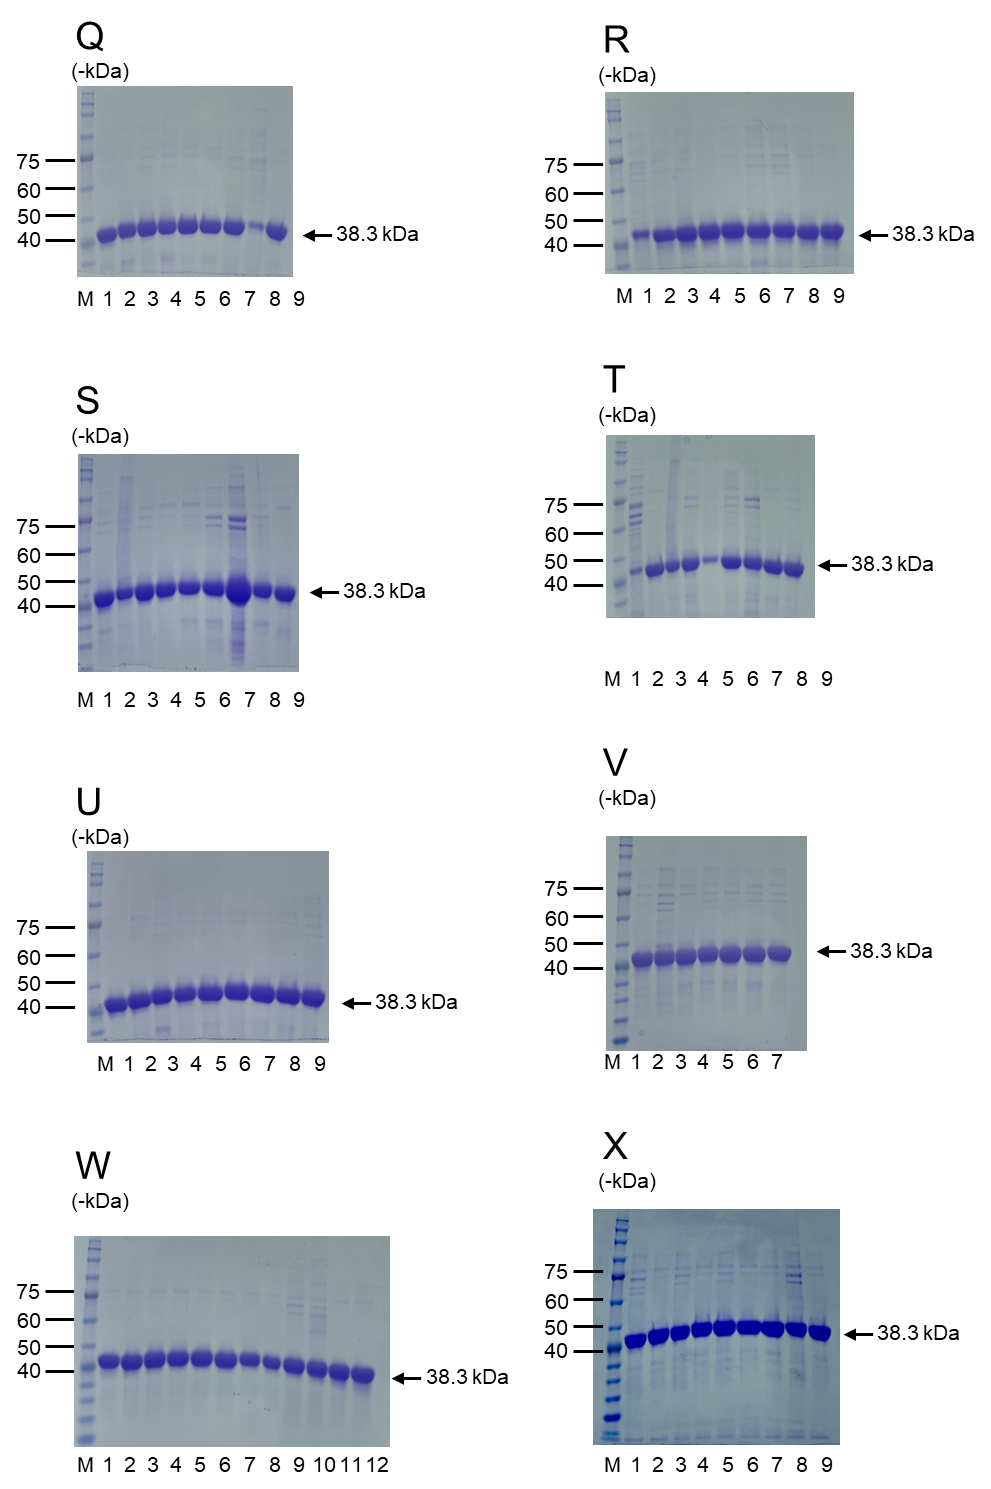


Figure S1. SDS-PAGE analyses of the purified (A) wild-type YADH (Lane 1, 38.3 kDa) and alanine-substituted variants, (B-C) W54 variants, (D-E) W92 variants, (F-G) Y119 variants, (H-I) M270 variants, (J-K) Y294 variants, (L-V) YADH-variants with multiple mutations in the initial library, and (W-X) YADH-variants predicted to have high activities. Lane M: molecular weight marker. Plasmid construction and SDS-PAGE analysis of mutated YADH variants were conducted in the same procedure.

Table S2 List of YADH variants

| Mutation | SDS-PAGE |
| --- | --- |
| WT | A-1 |
| T45A | A-2 |
| W54A | A-3 |
| L56A | A-4 |
| W92A | A-5 |
| Y119A | A-6 |
| M270A | A-7 |
| Y294A | A-8 |
| V295A | A-9 |
| W54C | B-1 |
| W54D | B-2 |
| W54E | B-3 |
| W54F | B-4 |
| W54G | B-5 |
| W54H | B-6 |
| W54I | B-7 |
| W54K | B-8 |
| W54L | B-9 |
| W54M | C-1 |
| W54N | C-2 |
| W54P | C-3 |
| W54Q | C-4 |
| W54R | C-5 |
| W54S | C-6 |
| W54T | C-7 |
| W54V | C-8 |
| W54Y | C-9 |
| W92C | D-1 |
| W92D | Not expressed |
| W92E | Not expressed |
| W92F | D-2 |
| W92G | D-3 |
| W92H | D-4 |
| W92I | D-5 |
| W92K | D-6 |
| W92L | D-7 |
| W92M | D-8 |
| W92N | E-1 |
| W92P | E-2 |
| W92Q | E-3 |
| W92R | E-4 |
| W92S | E-5 |
| W92T | E-6 |
| W92V | E-7 |
| W92Y | E-8 |
| Y119C | F-1 |
| Y119D | F-2 |
| Y119E | F-3 |
| Y119F | F-4 |
| Y119G | F-5 |
| Y119H | F-6 |
| Y119I | F-7 |
| Y119K | F-8 |
| Y119L | F-9 |
| Y119M | G-1 |
| Y119N | G-2 |
| Y119Q | G-3 |
| Y119R | G-4 |
| Y119S | G-5 |
| Y119T | G-6 |
| Y119V | G-7 |
| Y119W | G-8 |
| M270C | H-1 |
| M270D | H-2 |
| M270E | H-3 |
| M270F | H-4 |
| M270G | H-5 |
| M270H | H-6 |
| M270I | H-7 |
| M270K | H-8 |
| M270L | H-9 |
| M270N | I-1 |
| M270P | I-2 |
| M270Q | I-3 |
| M270R | I-4 |
| M270S | I-5 |
| M270T | I-6 |
| M270V | I-7 |
| M270W | I-8 |
| M270Y | I-9 |
| Y294C | J-1 |
| Y294D | J-2 |
| Y294E | J-3 |
| Y294F | J-4 |
| Y294G | J-5 |
| Y294H | J-6 |
| Y294I | J-7 |
| Y294K | J-8 |
| Y294L | J-9 |
| Y294M | K-1 |
| Y294N | K-2 |
| Y294P | K-3 |
| Y294Q | K-4 |
| Y294R | K-5 |
| Y294S | K-6 |
| Y294T | K-7 |
| Y294V | K-8 |
| Y294W | K-9 |
| HCRYC | L-1 |
| SGVYV | L-2 |
| VSFRY | L-3 |
| CGVGG | L-4 |
| CVCFI | L-5 |
| VGCCY | L-6 |
| VVVCS | L-7 |
| GFFGV | L-8 |
| YACDI | L-9 |
| RVYVC | M-1 |
| ARVSC | M-2 |
| SVFAC | M-3 |
| GCSGN | M-4 |
| FCCFY | M-5 |
| WWAMA | M-6 |
| WWAMN | M-7 |
| WWCMT | M-8 |
| WWDMF | M-9 |
| WWFMC | N-1 |
| WWFMN | N-2 |
| WWFMV | N-3 |
| WWGMC | N-4 |
| WWGMR | N-5 |
| WWRMF | N-6 |
| WWVMV | N-7 |
| GCFFA | N-8 |
| IAYTA | N-9 |
| IWFCA | O-1 |
| HFFCA | O-2 |
| HFFDA | O-3 |
| AFFAA | O-4 |
| WFFIA | O-5 |
| HCFMA | O-6 |
| IFAMA | O-7 |
| HFAAA | O-8 |
| ICASA | O-9 |
| WFAIA | P-1 |
| AWASA | P-2 |
| IWYMA | P-3 |
| HAATA | P-4 |
| HCFIA | P-5 |
| ICFTY | P-6 |
| IWFTS | P-7 |
| AWFSY | P-8 |
| GWYIY | P-9 |
| ACFCY | Q-1 |
| ACYDY | Q-2 |
| HAAMY | Q-3 |
| IWADY | Q-4 |
| HWASN | Q-5 |
| CWATY | Q-6 |
| HWATN | Q-7 |
| WCATY | Q-8 |
| AAAFY | Q-9 |
| ICATY | R-1 |
| IWYAY | R-2 |
| ACYSC | R-3 |
| ICYMC | R-4 |
| ACYTC | R-5 |
| HFFDC | R-6 |
| HFYTC | R-7 |
| WFFMC | R-8 |
| ICYTC | R-9 |
| ACACC | S-1 |
| ACAAC | S-2 |
| WFAIC | S-3 |
| HWATC | S-4 |
| IWADC | S-5 |
| CFAMC | S-6 |
| HCACC | S-7 |
| ICADC | S-8 |
| CFFSC | S-9 |
| WCAIY | T-1 |
| GWATN | T-2 |
| GCASC | T-3 |
| CCACA | T-4 |
| GAACY | T-5 |
| WWAFC | T-6 |
| GCACY | T-7 |
| CFYIY | T-8 |
| HCYTY | T-9 |
| GWFSY | U-1 |
| GWAIC | U-2 |
| CAADY | U-3 |
| WWYCA | U-4 |
| AFFCA | U-5 |
| ACFMY | U-6 |
| ACFAY | U-7 |
| CAAAY | U-8 |
| ICAAY | U-9 |
| IAASY | V-1 |
| WFATY | V-2 |
| GCFAN | V-3 |
| WAACY | V-4 |
| GAFCY | V-5 |
| CWFCY | V-6 |
| AWAIY | V-7 |
| FWMMY | W-1 |
| FWFMY | W-2 |
| FWYIY | W-3 |
| FWYVY | W-4 |
| FWYGY | W-5 |
| FWFVY | W-6 |
| FWMVY | W-7 |
| FWMIY | W-8 |
| MWMMY | W-9 |
| MWYVY | W-10 |
| MWYIY | W-11 |
| MWYGY | W-12 |
| MWFMY | X-1 |
| LWYIY | X-2 |
| LWFMY | X-3 |
| YWMMY | X-4 |
| YWYGY | X-5 |
| VWYIY | X-6 |
| VWFMY | X-7 |
| IWMMY | X-8 |
| IWFMY | X-9 |


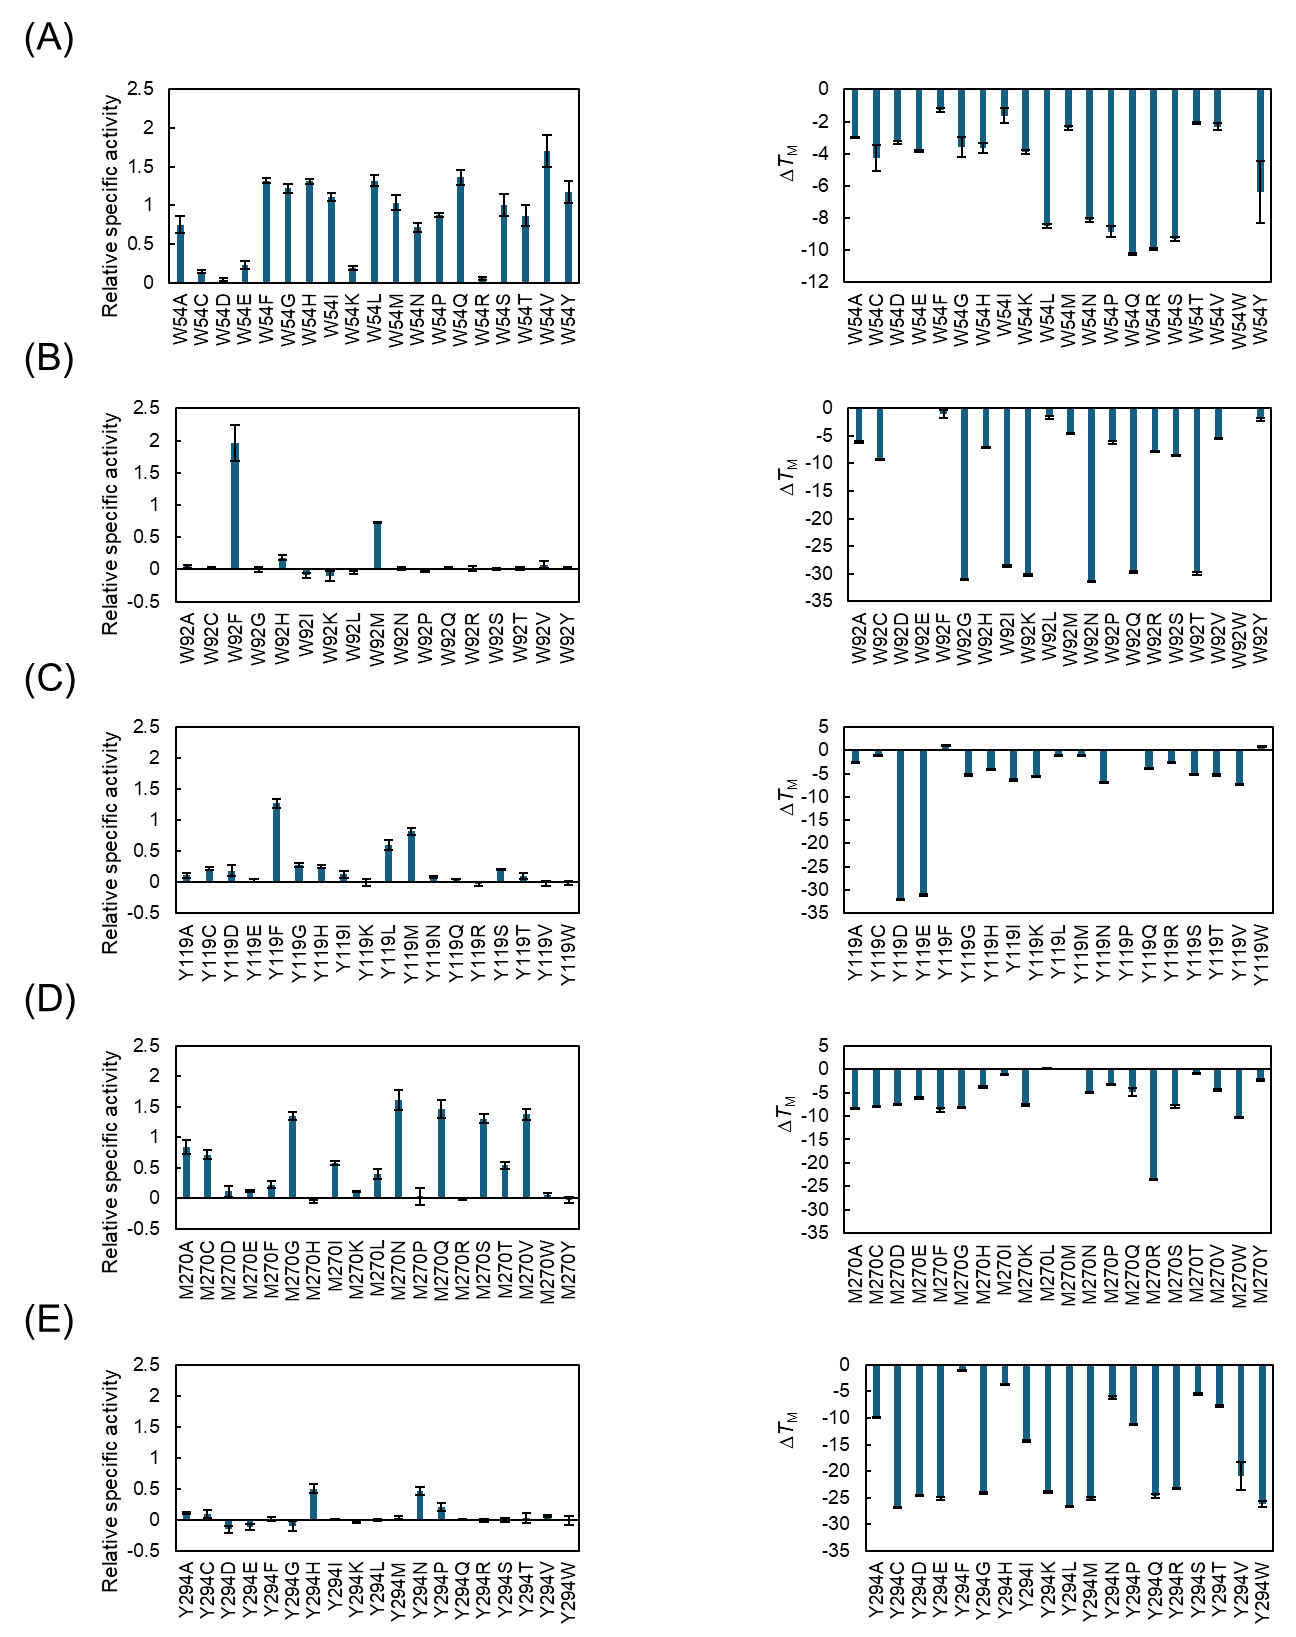


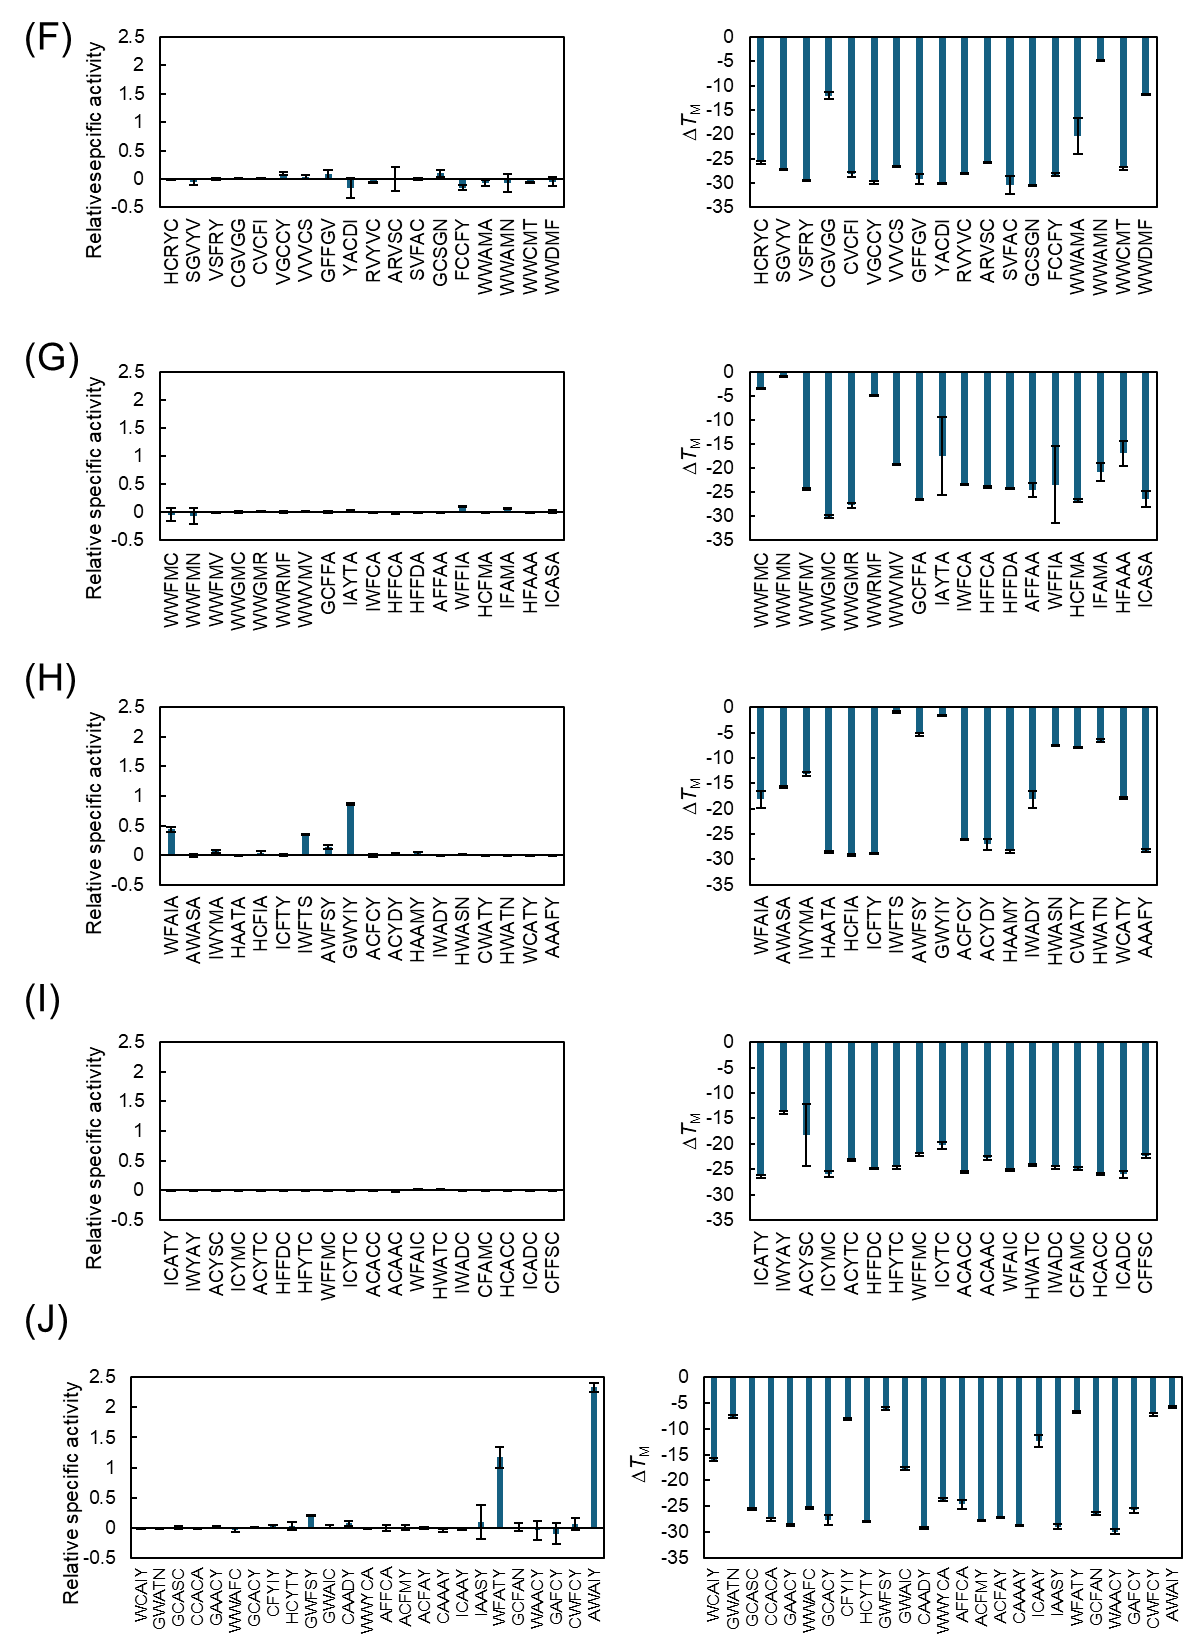


**Figure S2** Experimental relative specific activity and thermostability of the (A) W54 variants, (B) W92 variants, (C) Y119 variants, (D) M270 variants, (E) Y294 variants, and (F)-(J) YADH variants with multiple mutations in the initial library. Data are presented as the mean ± standard deviation of three independent experiments.

**Figure S3** Model performances (a) Descriptor and model comparison using Spearman r, (b) Performance of the SVR model for predicting activities: Observed vs. Predicted (Spearman’s ρ = 0.639, p = 1.8E-12), (c) ROC curve of the SVC model for predicting activity probability (AUC = 0.7801), (d) Performance of the SVR model for predicting DTm: Observed vs. Predicted (Spearman’s ρ = 0.730, p = 7.1E-33)

**Table. S3** Metrics of the model: (a) Ranking-based metrics of the SVR model for predicting activities, (b) Top-k recall metrics of the SVR model for predicting D*T*M

(a)

| Top 10% median activity | 0.1528 |
| --- | --- |
| Overall median activity | -2.777 |
| Fraction above WT in Top 10% | 0.6667 |

(b)

| Top-10% recall | 0.8947 |
| --- | --- |
| Top-20% recall | 0.8421 |
| Top-30% recall | 0.8421 |


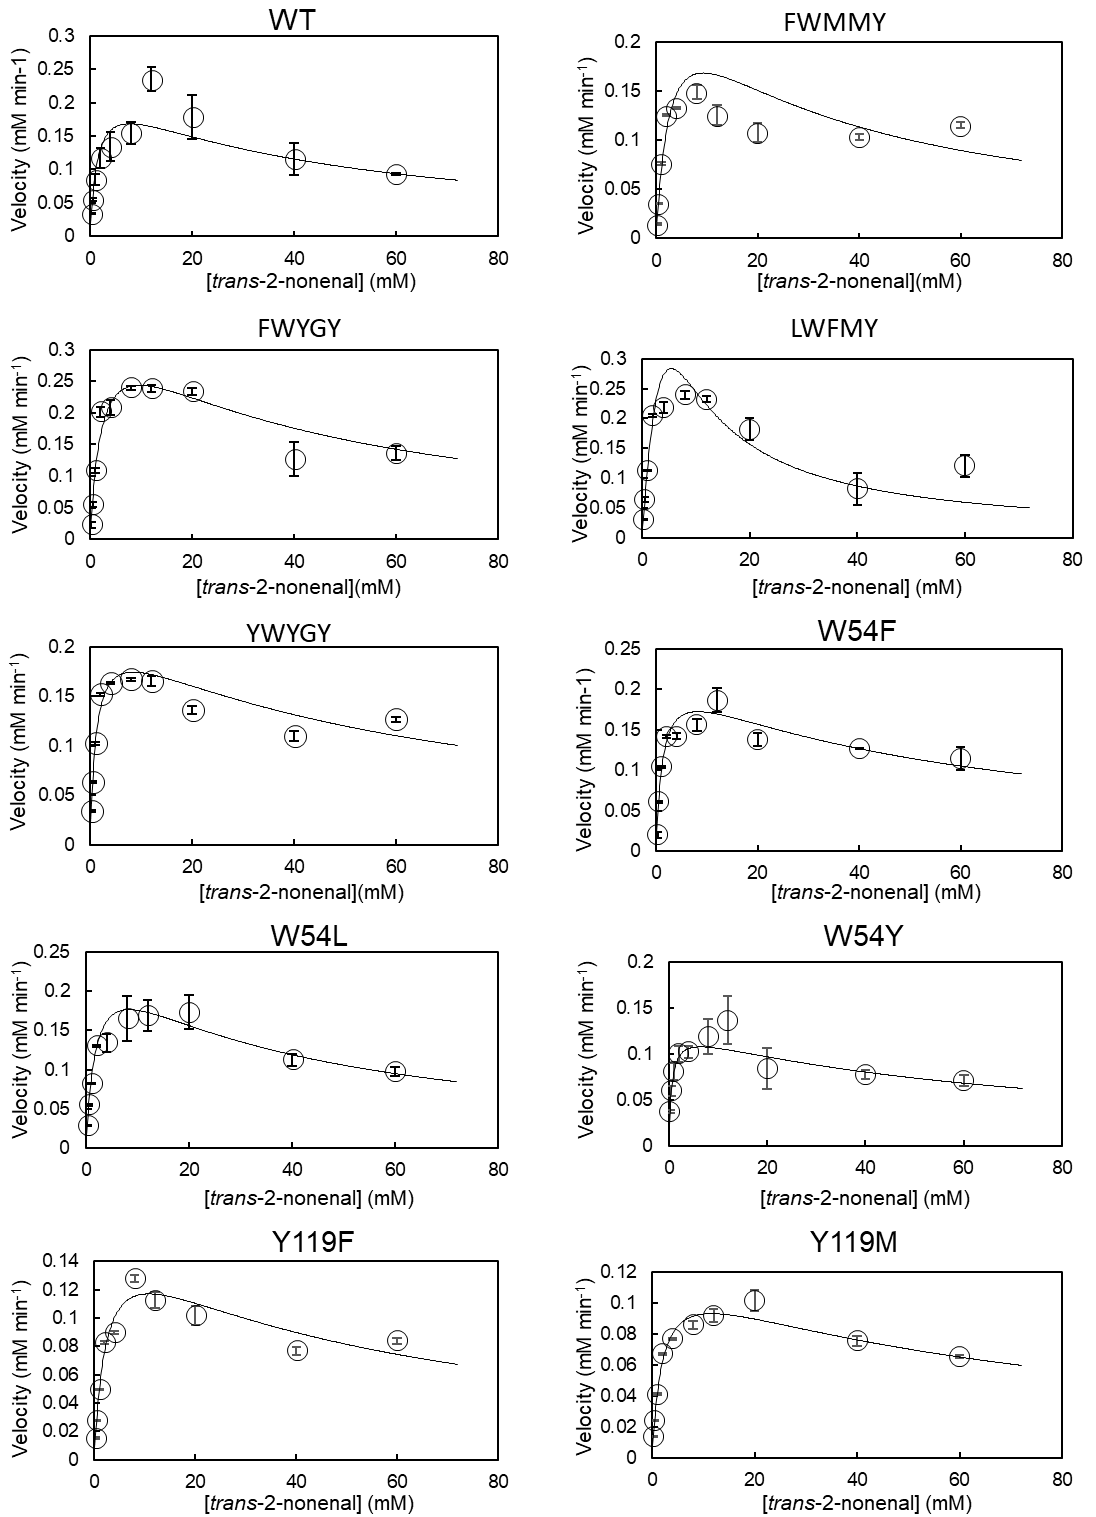

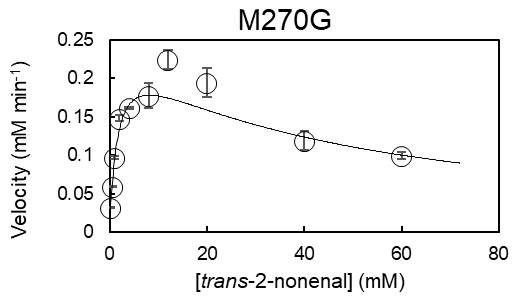


Figure S4 Kinetic parameters of the YADH variants. Data are presented as the mean ± standard deviation of three independent experiments.
