# Supplementary material
Source: Research Square preprint supplement (doi:10.21203/rs.3.rs-9708759/v1)
Supplement: Supplementary file 2 [file bf02748c8bbfac9294bb0330.xlsx]

## Sheet: Sheet1
Ranking	name	Score
1	FWMMY	0.120624
2	MWMMY	0.0980239
3	FWFMY	0.0654779
4	FWYIY	0.0595152
5	FWYVY	0.0527319
6	LWYIY	0.0295805
7	YWMMY	0.0259178
8	FWYGY	0.0254535
9	LWFMY	0.0223877
10	MWYVY	0.0174233
11	MWYIY	0.0139439
12	VWYIY	0.0137689
13	MWYGY	0.0121391
14	FWFVY	0.0113135
15	LWMMY	0.00811277
16	FWMVY	0.00801927
17	IWMMY	0.00541656
18	FWMIY	0.00520925
19	VWFMY	0.00394821
20	MWFMY	0.0016847
21	YWYGY	0.000247768
22	IWFMY	-0.00119297
23	AGFGV	-0.00158803
24	AGFAV	-0.0016278
25	AGFSV	-0.00165097
26	AGFGL	-0.0016613
27	AGPSV	-0.00169932
28	ASFGV	-0.00170265
29	QGFGV	-0.00172431
30	ASPSV	-0.0017345
31	TGFGV	-0.00174398
32	ASFAV	-0.00174916
33	ASFSV	-0.0017611
34	GGFGV	-0.00176349
35	SGPSV	-0.00177116
36	AGCSV	-0.00177327
37	AGFSL	-0.00177459
38	AGFAL	-0.00177771
39	AGISV	-0.0017864
40	SGFGV	-0.00179575
41	GGPSV	-0.00180146
42	SSPSV	-0.00180334
43	ACFGL	-0.00180428
44	ASFGL	-0.00180783
45	AGPSL	-0.00180979
46	AGPGV	-0.00181657
47	SGFAV	-0.00181893
48	QSFGV	-0.00182848
49	HGFGV	-0.001834
50	GSPSV	-0.00183525
51	SGCSV	-0.00184027
52	SGFSV	-0.00184147
53	NGFAV	-0.00184556
54	ACFGV	-0.00184883
55	ASISV	-0.00184895
56	MGCSV	-0.00184955
57	TSFGV	-0.00185386
58	GGCSV	-0.00185397
59	NGFGV	-0.00185738
60	GSFGV	-0.00186863
61	ASPSL	-0.00186993
62	VGFGV	-0.00187093
63	ASPGV	-0.00187242
64	AGCMV	-0.00187611
65	GGFGL	-0.00187705
66	SGFGL	-0.00188029
67	AGISL	-0.00188055
68	QGFGL	-0.00188067
69	AGPAV	-0.00188125
70	AEFGV	-0.00188302
71	GGPGV	-0.00188533
72	AGCSL	-0.00188873
73	SGPSL	-0.00188918
74	ASCSV	-0.00189102
75	NGFSV	-0.00189187
76	AGIGV	-0.00189597
77	AGPGL	-0.00189642
78	TGFGL	-0.0018991
79	GGFAV	-0.00190055
80	GGFSV	-0.0019055
81	QGFAV	-0.0019059
82	AGFTV	-0.00190643
83	MGCMG	-0.00190844
84	AEFAV	-0.00190851
85	IGCSV	-0.00191067
86	SSFGV	-0.00191371
87	ADFGV	-0.00191965
88	ASFSL	-0.00191974
89	ASPAV	-0.00192168
90	FGCSV	-0.00192423
91	AGPTV	-0.00192428
92	ADFSV	-0.00192512
93	SGISV	-0.00192544
94	SGPGV	-0.00192735
95	AGPSY	-0.0019274
96	ADPSV	-0.00192989
97	HSFGV	-0.00193061
98	QGFSV	-0.00193311
99	ADFAV	-0.00193316
100	AEFSV	-0.00193488
101	ASFAL	-0.00193585
102	AIFGV	-0.00193644
103	GSPGV	-0.00193668
104	GGISV	-0.00194459
105	SSPSL	-0.0019458
106	SSFAV	-0.00194604
107	NGFGL	-0.00194795
108	GGPSL	-0.00194951
109	AGIGL	-0.00195048
110	MGCMV	-0.00195096
111	SGPAV	-0.00195354
112	SGPSY	-0.00195371
113	LGFGV	-0.00195489
114	SSFSV	-0.00195703
115	AGIAV	-0.00195759
116	SSCSV	-0.00196006
117	SGCSL	-0.00196159
118	YGCSV	-0.00196547
119	NSFAV	-0.00196672
120	AGCAV	-0.00196706
121	FGCMG	-0.00196932
122	TGFSV	-0.00196975
123	IGCMV	-0.00196976
124	ASISL	-0.00197208
125	NGPSV	-0.00197221
126	NSFGV	-0.00197245
127	ADFGL	-0.00197298
128	EGFGV	-0.00197304
129	TGFAV	-0.00197409
130	GSCSV	-0.00197432
131	MSCSV	-0.00197482
132	ASIGV	-0.00197778
133	SSPGV	-0.00197857
134	ASPGL	-0.0019799
135	TGCSV	-0.00198097
136	AGPSF	-0.00198132
137	FGCMV	-0.00198153
138	SGFSL	-0.00198398
139	SSISV	-0.00198519
140	MGCFG	-0.00198751
141	SDPSV	-0.00198878
142	ASPTV	-0.0019888
143	SSPAV	-0.00198922
144	AGFTL	-0.00199018
145	SGFAL	-0.00199055
146	YGCMG	-0.0019953
147	GDPSV	-0.00199588
148	GGPAV	-0.00199756
149	FGCFG	-0.00199783
150	GGCSL	-0.00199812
151	GGPGL	-0.00199828
152	AEFGL	-0.00199832
153	VSFGV	-0.00199984
154	TGPGV	-0.00199986
155	NSPSV	-0.00200046
156	NSFSV	-0.00200189
157	SGPSF	-0.00200362
158	SGCMV	-0.00200448
159	GSISV	-0.00200579
160	KGFGV	-0.00200636
161	GSPSL	-0.00200798
162	AGPSM	-0.00201113
163	SGPGL	-0.00201242
164	TGPSV	-0.00201251
165	GSFSV	-0.00201374
166	IGPSV	-0.00201422
167	ADPSL	-0.00201499
168	AAPSV	-0.00201624
169	NGFAL	-0.00201654
170	QSFGL	-0.00201743
171	GSFGL	-0.00201744
172	QEFGV	-0.00201789
173	ADFSL	-0.00201863
174	TGIGV	-0.00201926
175	GGIGV	-0.0020196
176	GSFAV	-0.0020199
177	AGPSI	-0.00202012
178	AGPTL	-0.00202041
179	VGFGL	-0.00202086
180	QSFAV	-0.00202161
181	AGCSY	-0.00202193
182	HGCSV	-0.00202319
183	SGISL	-0.00202429
184	AGPAL	-0.00202735
185	AGCSI	-0.00202761
186	ASIAV	-0.0020281
187	SGPSI	-0.00202831
188	SGPSM	-0.00203053
189	ASCSL	-0.0020314
190	SSFGL	-0.00203271
191	GSPAV	-0.00203305
192	MGCCV	-0.00203315
193	FGCFV	-0.00203386
194	AEPSV	-0.00203415
195	NGFSL	-0.00203513
196	TEFGV	-0.00203617
197	QSFSV	-0.00203688
198	SGCSI	-0.00203747
199	ATFGV	-0.00203946
200	HGFSV	-0.00203955
201	SGCAV	-0.00204058
202	IGCSL	-0.00204112
203	PGPSV	-0.00204307
204	TSFGL	-0.00204387
205	IGCFV	-0.00204439
206	AAFGV	-0.00204546
207	QGFTV	-0.00204576
208	PGFAV	-0.00204785
209	NGCSV	-0.00204857
210	PGCSV	-0.00204858
211	ADISV	-0.00204941
212	PGFSV	-0.00205
213	HGFAV	-0.00205085
214	ISCSV	-0.00205162
215	PGCMV	-0.00205349
216	SGPTV	-0.00205396
217	AGPEV	-0.00205452
218	AGPEY	-0.00205454
219	MGCFV	-0.00205544
220	TGISV	-0.00205604
221	AGCGV	-0.00205626
222	TSPSV	-0.00205656
223	ADFAL	-0.00205666
224	ASPSY	-0.00205682
225	QDFGV	-0.00205693
226	AGITV	-0.0020578
227	YGCFG	-0.00205864
228	GDFGV	-0.00205917
229	AGISY	-0.00206007
230	FSCSV	-0.00206009
231	ASPSI	-0.00206278
232	QGIGV	-0.00206291
233	ASIGL	-0.00206295
234	TSPGV	-0.00206344
235	ISPSV	-0.00206409
236	FGCCV	-0.00206417
237	TDFGV	-0.00206477
238	GGCAV	-0.0020651
239	MGCMT	-0.00206565
240	ASPSM	-0.00206863
241	ASFTV	-0.00206915
242	GGCMV	-0.0020692
243	AGCIV	-0.00207017
244	SSPSI	-0.00207077
245	AGCTV	-0.00207106
246	GGCSI	-0.00207115
247	GGPTV	-0.00207173
248	GEFGV	-0.00207208
249	SCFGL	-0.00207345
250	SGCSY	-0.00207446
251	PSPSV	-0.00207593
252	GGISL	-0.0020763
253	GSPGL	-0.00207721
254	SSPSY	-0.00207766
255	SDPSL	-0.00207935
256	NGISV	-0.00207979
257	ASCMV	-0.00208035
258	AGCFV	-0.00208052
259	TSFSV	-0.00208235
260	FGCYV	-0.00208299
261	AGPQY	-0.00208313
262	GGFSL	-0.00208346
263	SGIGV	-0.00208515
264	MSCMG	-0.00208542
265	AGIAL	-0.00208545
266	ADPGV	-0.00208644
267	LGFGL	-0.00208676
268	SSPSM	-0.00208729
269	EGCSV	-0.00208817
270	EGPSV	-0.00208862
271	VGFSV	-0.00208935
272	ESFGV	-0.00209013
273	GCFGV	-0.00209074
274	MGCYV	-0.00209086
275	ASPEV	-0.00209106
276	SSPGL	-0.00209149
277	GGPSI	-0.0020936
278	YGCMV	-0.0020941
279	VGCSV	-0.0020942
280	QGPGV	-0.00209463
281	AGPTY	-0.00209493
282	ASPAL	-0.00209505
283	YSCSV	-0.00209515
284	NSFGL	-0.00209619
285	GSIGV	-0.00209654
286	LSFGV	-0.00209682
287	ASPSF	-0.00209788
288	NGPSL	-0.00209811
289	HGFGL	-0.00209887
290	TSFAV	-0.00209962
291	ASCAV	-0.00209992
292	AGPEF	-0.00210035
293	PGFGV	-0.00210207
294	SAPSV	-0.0021026
295	GCFGL	-0.00210362
296	AEFSL	-0.00210424
297	KSFGV	-0.00210431
298	IGCYV	-0.00210444
299	TSCSV	-0.00210474
300	GGIGL	-0.00210564
301	SDFSV	-0.00210573
302	SGIAV	-0.00210579
303	AEFAL	-0.00210621
304	SSCSL	-0.00210624
305	MGCYG	-0.00210655
306	SGPAL	-0.00210762
307	GGFAL	-0.00210807
308	TSIGV	-0.00210855
309	FGCMT	-0.00210968
310	AGPDV	-0.00210995
311	SCFGV	-0.0021104
312	SEFGV	-0.0021117
313	SSISL	-0.00211352
314	GGCGV	-0.00211426
315	EGFGL	-0.00211428
316	GDPSL	-0.00211494
317	SSPTV	-0.002115
318	QGCSV	-0.00211503
319	NGPGV	-0.00211528
320	SSPSF	-0.00211579
321	ASPTL	-0.00211624
322	SDFAV	-0.00211658
323	ADISL	-0.00211663
324	SDFGV	-0.00211685
325	VGFAV	-0.00211697
326	GDPGV	-0.00211823
327	AGCML	-0.00211866
328	SEFAV	-0.00211976
329	EGFAV	-0.00212117
330	SGPEY	-0.00212118
331	AGISF	-0.00212153
332	SEPSV	-0.00212266
333	AEISV	-0.00212305
334	AGCAL	-0.00212448
335	AGFAI	-0.00212487
336	ASPDV	-0.00212548
337	LGFSV	-0.00212726
338	QGISV	-0.00212729
339	ADPSY	-0.00212776
340	ADPAV	-0.00212778
341	HSCSV	-0.00212797
342	NGFTV	-0.00212824
343	TSISV	-0.00212922
344	AGITL	-0.00212951
345	IGPSL	-0.00212956
346	ESPSV	-0.00213
347	ICCMV	-0.00213006
348	FGCYG	-0.00213023
349	GSPTV	-0.00213047
350	ADCSV	-0.00213054
351	MGCSL	-0.00213106
352	AGCYV	-0.00213151
353	AGPEL	-0.00213185
354	QGPSV	-0.00213267
355	YGCCV	-0.00213277
356	AECSV	-0.00213364
357	HSFSV	-0.002134
358	NSISV	-0.00213487
359	NGPAV	-0.00213552
360	EGFSV	-0.00213587
361	GDFSV	-0.00213617
362	SDPSY	-0.00213658
363	SSFSL	-0.00213674
364	AGCEV	-0.00213804
365	MGCSG	-0.00213884
366	SGIGL	-0.00213887
367	SGPQY	-0.00213921
368	AGISM	-0.00213951
369	GGIAV	-0.00213964
370	AGFAA	-0.00213965
371	GSPSI	-0.00214048
372	VGIGV	-0.00214109
373	AAFAV	-0.00214151
374	ADPTV	-0.00214295
375	MGCIV	-0.00214403
376	QIFGV	-0.00214403
377	GSCSL	-0.00214423
378	AGPQF	-0.00214444
379	HDFGV	-0.00214542
380	HGCMG	-0.00214576
381	PGPSL	-0.00214587
382	MGCIG	-0.00214591
383	ACFTL	-0.00214599
384	AGPGY	-0.00214621
385	QSIGV	-0.00214632
386	AGISI	-0.00214634
387	ADPGL	-0.00214696
388	GGPSY	-0.0021474
389	SEFSV	-0.0021475
390	AGCDV	-0.0021484
391	QAFGV	-0.00214891
392	GDFGL	-0.00214941
393	MGCDV	-0.00214957
394	NEFAV	-0.0021501
395	ATFAV	-0.0021502
396	AGCSF	-0.00215025
397	AGFSI	-0.00215138
398	NSPSL	-0.00215145
399	HGFTV	-0.00215157
400	EGPGV	-0.00215203
401	QGFSL	-0.00215292
402	QSPGV	-0.00215344
403	LGFAV	-0.00215349
404	ACCMV	-0.00215349
405	GEPSV	-0.00215375
406	MGCAV	-0.00215393
407	QGFAL	-0.00215412
408	PGFGL	-0.00215422
409	AGPQV	-0.00215466
410	SSFAL	-0.00215649
411	TCFGV	-0.0021567
412	ASITV	-0.00215679
413	ASCSI	-0.0021572
414	SGPEV	-0.0021574
415	SGPTL	-0.00215795
416	IGCSI	-0.00215809
417	AGFGI	-0.00215879
418	AAISV	-0.00215928
419	VEFGV	-0.0021593
420	HEFGV	-0.00216033
421	PGISV	-0.00216127
422	AGPTF	-0.00216136
423	SGISY	-0.00216143
424	TGIGL	-0.00216149
425	SGPEF	-0.00216149
426	FSCMG	-0.0021616
427	TGPGL	-0.00216195
428	HGCMV	-0.00216209
429	IGCDV	-0.00216225
430	SGFTV	-0.00216244
431	SSIGV	-0.00216273
432	NSPGV	-0.00216313
433	AGCGL	-0.00216352
434	MSCFG	-0.0021637
435	TGCSL	-0.00216388
436	SGCGV	-0.00216405
437	PGFSL	-0.00216409
438	GDFAV	-0.00216411
439	AGCMT	-0.00216421
440	ASPEY	-0.00216424
441	HGIGV	-0.00216572
442	MGCSA	-0.00216681
443	GDISV	-0.00216692
444	NDFAV	-0.00216712
445	HSFAV	-0.00216741
446	GSISL	-0.00216754
447	MGCCG	-0.0021677
448	AGPQM	-0.0021677
449	NSCSV	-0.0021679
450	SGPDV	-0.002168
451	QTFGV	-0.00216803
452	SAPSC	-0.00216819
453	NGPSY	-0.00216824
454	NSPAV	-0.00216899
455	PGCSL	-0.00216918
456	TGFTV	-0.00216923
457	SSCSI	-0.00216948
458	SSPAL	-0.0021696
459	AGCSA	-0.00217057
460	AGYGV	-0.00217095
461	HGPGV	-0.00217144
462	QSPSV	-0.00217147
463	SSIAV	-0.00217178
464	TGCGV	-0.00217189
465	SDISV	-0.00217234
466	VGISV	-0.00217251
467	AAPGV	-0.00217252
468	ASPQY	-0.0021733
469	NSFAL	-0.00217407
470	FGCFT	-0.00217464
471	HSPSV	-0.00217512
472	YGCFV	-0.00217532
473	ASPQV	-0.00217533
474	SSCAV	-0.00217547
475	NGCMV	-0.00217553
476	AEPGV	-0.00217614
477	NEFGV	-0.00217674
478	SDFGL	-0.00217679
479	VGPGV	-0.002177
480	QSFTV	-0.00217747
481	LGCSV	-0.00217761
482	NGCSL	-0.00217771
483	PSCSV	-0.00217784
484	AAFSV	-0.00217814
485	SDPGV	-0.0021783
486	NGPTV	-0.0021787
487	TIFGV	-0.00217895
488	FGCDV	-0.00217918
489	AGPEM	-0.00217985
490	GGPSM	-0.00218038
491	GGCTV	-0.00218044
492	SGCTV	-0.00218056
493	NSFSL	-0.00218057
494	HGPSV	-0.00218063
495	MGCST	-0.00218092
496	SSPDV	-0.00218165
497	NDFSV	-0.00218184
498	VGPSV	-0.00218193
499	GAPSV	-0.00218203
500	YGCYG	-0.0021821
501	YSCMG	-0.00218224
502	AGPTM	-0.00218253
503	DGPSV	-0.00218257
504	PGCFV	-0.00218266
505	ICCFV	-0.00218319
506	GGPAL	-0.00218394
507	ADFTV	-0.0021842
508	MGCFT	-0.00218477
509	HSPGV	-0.00218491
510	MGCSI	-0.00218506
511	FSCFG	-0.0021851
512	SDPAV	-0.00218555
513	VSFGL	-0.00218585
514	AEPSL	-0.00218611
515	NGISL	-0.0021866
516	QEFAV	-0.00218667
517	YGCMT	-0.00218718
518	AACSV	-0.00218768
519	AGPSA	-0.00218796
520	ASIAL	-0.00218799
521	MGCGV	-0.00218878
522	ADPSF	-0.00218889
523	FGCSL	-0.00218901
524	AGCTL	-0.00219005
525	PSFSV	-0.00219082
526	GGFTV	-0.00219096
527	AGFSA	-0.00219154
528	SSPEV	-0.00219175
529	SGCFV	-0.00219255
530	ASFTL	-0.00219307
531	QDFGL	-0.00219321
532	MGFGV	-0.00219395
533	SGCIV	-0.00219399
534	QSISV	-0.00219455
535	GGCSA	-0.00219456
536	PGFAL	-0.00219463
537	ASCGV	-0.00219511
538	ASPEL	-0.0021952
539	MTCMG	-0.00219544
540	GEFAV	-0.00219579
541	GDCSV	-0.00219591
542	SGPQF	-0.002196
543	TGFSL	-0.00219616
544	HAPSC	-0.00219621
545	SDPSF	-0.00219622
546	SGCSF	-0.00219638
547	GGPEV	-0.00219725
548	AGPDY	-0.00219731
549	SDCSV	-0.00219755
550	HGISV	-0.00219783
551	QCFGV	-0.00219789
552	NCFGL	-0.00219791
553	QDFSV	-0.00219853
554	AGFGY	-0.00219887
555	SGPTY	-0.00219916
556	ICCYV	-0.00219918
557	TDFGL	-0.00219932
558	AGCMI	-0.0021994
559	MSCMV	-0.00219957
560	ADIGV	-0.00219967
561	GSCAV	-0.00220041
562	NDFGV	-0.00220054
563	AGIEV	-0.00220065
564	SGCDV	-0.00220066
565	ASPEF	-0.0022009
566	IGCCV	-0.00220126
567	GGPSF	-0.00220166
568	NEFSV	-0.00220211
569	FGCIV	-0.00220263
570	GDPAV	-0.00220265
571	AGCST	-0.00220297
572	QDFAV	-0.00220299
573	MGPSV	-0.00220344
574	ASPQM	-0.0022036
575	PSFAV	-0.00220422
576	SGPDY	-0.00220452
577	SGCAL	-0.00220468
578	SGCSA	-0.00220532
579	GSIAV	-0.00220554
580	TGCAV	-0.0022058
581	HGCTV	-0.00220623
582	TGCMV	-0.00220629
583	GSCSI	-0.0022063
584	IGCAV	-0.00220668
585	HSIGV	-0.00220686
586	GEFSV	-0.00220689
587	ACFTV	-0.00220691
588	PSPSL	-0.0022073
589	ADPQY	-0.00220743
590	IGPSM	-0.00220752
591	AGFIV	-0.00220829
592	MGCCT	-0.00220832
593	IGCSY	-0.00220841
594	NGPSF	-0.00220842
595	NGPGL	-0.00220903
596	AEFTV	-0.00220928
597	ISPSL	-0.00220933
598	GGPTL	-0.00220933
599	IGISV	-0.00220963
600	NDPSV	-0.00220969
601	QGYGV	-0.00220978
602	EGISV	-0.00220992
603	GDPGL	-0.00220995
604	ISCSL	-0.00221027
605	AGPDL	-0.00221077
606	DSPSV	-0.00221081
607	AGAEY	-0.00221187
608	SDFSL	-0.00221207
609	AGCEY	-0.00221224
610	ESPGV	-0.00221234
611	QGIGL	-0.00221264
612	GGCSY	-0.00221297
613	SGPQM	-0.00221302
614	SGISF	-0.00221302
615	MGCEV	-0.00221329
616	PGPSY	-0.00221333
617	YGCSG	-0.00221336
618	YGCYV	-0.00221368
619	GSIGL	-0.00221431
620	ADPEY	-0.00221448
621	AGPMV	-0.00221459
622	ESCSV	-0.00221517
623	ASPSA	-0.0022154
624	QEFGL	-0.00221557
625	ADPTL	-0.00221563
626	SECSV	-0.00221583
627	HGFAG	-0.00221618
628	TGPSL	-0.00221624
629	NGPSM	-0.00221627
630	TAFGV	-0.00221666
631	VSFSV	-0.00221704
632	MGCCA	-0.00221708
633	AGIDV	-0.00221714
634	AGCQV	-0.00221721
635	FCCFV	-0.0022174
636	IGPSY	-0.00221746
637	NGIGV	-0.00221775
638	AAPAV	-0.00221791
639	TDFSV	-0.00221798
640	ATFSV	-0.00221845
641	TGPTV	-0.00221882
642	FGCCG	-0.00221907
643	QEFSV	-0.00221908
644	SGISM	-0.00221952
645	TCFGL	-0.00221986
646	QGFGA	-0.00221995
647	SGCEV	-0.00222038
648	MSCCV	-0.00222072
649	SGPSA	-0.00222093
650	GGPDV	-0.00222095
651	WGCMG	-0.00222162
652	SSCMV	-0.00222194
653	AGIGY	-0.00222207
654	YGCCG	-0.00222243
655	ASISI	-0.00222245
656	PGPSM	-0.00222316
657	AEPAV	-0.00222363
658	HSISV	-0.00222364
659	HGCGV	-0.00222366
660	ISCMV	-0.0022239
661	AGCEL	-0.00222405
662	TDPSV	-0.00222466
663	PSISV	-0.00222521
664	SGISI	-0.00222525
665	MSCSG	-0.00222543
666	VSCSV	-0.00222569
667	AGPGF	-0.00222598
668	ASPQF	-0.0022264
669	TTFGV	-0.00222724
670	ASCTV	-0.00222742
671	NGCAV	-0.0022277
672	MECSV	-0.00222795
673	ASISM	-0.00222806
674	AGIMV	-0.00222861
675	GECSV	-0.00222884
676	SSPQY	-0.00222935
677	GEFGL	-0.00222986
678	IGCIV	-0.00222997
679	TGPAV	-0.00223028
680	ASPEM	-0.00223047
681	NGIAV	-0.00223048
682	SSPEY	-0.00223056
683	HGCAV	-0.00223068
684	AGYGL	-0.00223076
685	GSFSL	-0.00223079
686	ADCSL	-0.00223098
687	GGCDV	-0.00223123
688	GSPEV	-0.00223168
689	YGCIG	-0.0022318
690	NSPTV	-0.00223181
691	VDFGV	-0.00223192
692	SGPGY	-0.00223195
693	IGCMT	-0.00223196
694	TGFAL	-0.00223258
695	SGPEM	-0.00223259
696	SGADY	-0.0022326
697	FCCMV	-0.00223261
698	MGICV	-0.00223275
699	MDCSV	-0.0022335
700	ADIGL	-0.00223372
701	MSPSV	-0.00223394
702	IGCFI	-0.00223398
703	GGPSA	-0.00223399
704	VSPSV	-0.00223406
705	TEFGL	-0.0022343
706	NGFTL	-0.00223466
707	ASCSY	-0.00223566
708	AGPAY	-0.00223571
709	QSCSV	-0.00223599
710	ASISY	-0.00223724
711	MECMG	-0.00223776
712	ADIAV	-0.0022378
713	QGFTL	-0.00223781
714	GSPDV	-0.00223788
715	FCCYV	-0.00223816
716	GGCEV	-0.0022383
717	ACFAV	-0.00223836
718	AGIEY	-0.00223836
719	VGCMV	-0.00223867
720	GIFGV	-0.00223902
721	SGIAL	-0.00223948
722	NCFGV	-0.00224005
723	YGCDV	-0.00224012
724	LGCMV	-0.0022406
725	ADFTL	-0.00224065
726	SEFGL	-0.00224086
727	HGFGA	-0.0022411
728	SDISL	-0.00224134
729	FTCMG	-0.00224153
730	QGPTV	-0.00224158
731	AGPDF	-0.0022416
732	SGPEL	-0.00224178
733	SDPGL	-0.00224186
734	HSFGL	-0.00224218
735	PGISL	-0.00224221
736	GSPSM	-0.0022424
737	YSCFG	-0.00224354
738	AGCCV	-0.00224374
739	VSIGV	-0.00224467
740	LGISV	-0.00224483
741	LEFGV	-0.00224499
742	AGFAT	-0.00224508
743	FSCMV	-0.00224546
744	FGCIG	-0.00224555
745	GGCST	-0.00224576
746	ADPAL	-0.00224595
747	AIFGL	-0.00224602
748	GSPAL	-0.00224616
749	SGPDF	-0.00224635
750	AGCDL	-0.00224644
751	DGPSY	-0.00224681
752	GDPTV	-0.00224725
753	LGIGV	-0.00224737
754	TGISL	-0.00224741
755	FGCSI	-0.0022478
756	AGASV	-0.00224783
757	MSCDV	-0.00224805
758	SSIGL	-0.00224849
759	ASPDL	-0.00224876
760	AGCYY	-0.00224922
761	SGPAY	-0.00224955
762	GGCGL	-0.00224979
763	SSPSA	-0.00224998
764	SSPQM	-0.00225032
765	SGCYV	-0.00225052
766	SSPTL	-0.00225074
767	QCFGL	-0.00225095
768	FGCCT	-0.00225101
769	FGCCA	-0.00225112
770	PGPSF	-0.00225123
771	AGITY	-0.00225139
772	ASCDV	-0.0022516
773	NGPSI	-0.00225197
774	TEFAV	-0.00225198
775	KGFGL	-0.00225251
776	VSPGV	-0.00225262
777	GSCGV	-0.0022527
778	AGADY	-0.00225293
779	ESFAV	-0.00225295
780	EGCSL	-0.00225314
781	TEFSV	-0.00225339
782	TSPGL	-0.00225374
783	SDPTV	-0.00225418
784	GGCIV	-0.00225427
785	GGCAL	-0.00225435
786	VIFGV	-0.00225478
787	SDFAL	-0.0022548
788	AEIGV	-0.00225485
789	SGPQV	-0.00225501
790	PGCYV	-0.00225519
791	TDFAV	-0.00225526
792	AGIEL	-0.00225552
793	ESFSV	-0.00225558
794	VSISV	-0.00225636
795	HGFSG	-0.00225642
796	AGCMG	-0.00225656
797	AGMSV	-0.00225667
798	FSCCV	-0.00225685
799	SDPQY	-0.00225685
800	PSFGV	-0.00225703
801	SGPTF	-0.00225726
802	ASIDV	-0.00225756
803	TGCSI	-0.00225762
804	IGPDV	-0.00225763
805	SGCML	-0.00225783
806	EGIGV	-0.00225852
807	GEPGV	-0.00225857
808	ADPEV	-0.00225867
809	SGAEY	-0.00225897
810	DGCSV	-0.00225926
811	VSFAV	-0.00225958
812	AEISL	-0.0022597
813	FGCAV	-0.00225975
814	TGIAV	-0.00225982
815	QGITV	-0.00226116
816	SGASY	-0.00226127
817	SGFTL	-0.00226147
818	YGCSA	-0.00226161
819	HSFAG	-0.00226175
820	SSPEF	-0.002262
821	QGPGL	-0.0022628
822	QGFGT	-0.00226309
823	TDPGV	-0.00226324
824	AGMGV	-0.00226352
825	SGPTM	-0.0022637
826	LSFSV	-0.00226372
827	MGCYT	-0.00226375
828	AGPKY	-0.00226381
829	ASASV	-0.00226386
830	AAPSL	-0.00226387
831	ASITL	-0.00226414
832	ACFAL	-0.00226419
833	LSFGL	-0.00226445
834	TGCTV	-0.00226497
835	AGAEF	-0.00226497
836	AGIQY	-0.00226515
837	HAFGV	-0.00226531
838	ASCEV	-0.00226571
839	ASCIV	-0.00226587
840	AGPQL	-0.00226591
841	NSPSM	-0.00226602
842	SACSV	-0.00226611
843	SDPEY	-0.0022663
844	SIFGV	-0.00226647
845	EGPSL	-0.00226672
846	NGFAI	-0.00226673
847	MACSV	-0.00226687
848	ESFGL	-0.00226689
849	FGCYT	-0.00226692
850	ASIEV	-0.00226723
851	PCFGL	-0.0022673
852	AECMV	-0.00226742
853	SGPAI	-0.00226749
854	NDFGL	-0.00226777
855	GDISL	-0.00226781
856	GGITV	-0.002268
857	HSAYC	-0.0022684
858	GSFAL	-0.00226861
859	ASPDY	-0.00226881
860	AGPAI	-0.00226891
861	SGITV	-0.0022692
862	YGCSL	-0.00226941
863	AGPGI	-0.00226943
864	PSPSM	-0.00226962
865	AGASY	-0.00227007
866	ATCSV	-0.00227027
867	GSPSA	-0.0022704
868	AAFGL	-0.00227057
869	HGCSG	-0.00227073
870	IGCMG	-0.00227099
871	HGCIV	-0.00227101
872	SGCST	-0.00227115
873	SDPSI	-0.00227136
874	NSISL	-0.00227137
875	IGCDL	-0.00227148
876	IGCML	-0.00227186
877	AGFEV	-0.00227187
878	NGFAA	-0.00227206
879	FGCFC	-0.00227208
880	HGCIG	-0.00227211
881	PSCMV	-0.00227218
882	AGPAM	-0.00227258
883	ADPEF	-0.00227269
884	WGCFG	-0.00227278
885	ADPSI	-0.00227289
886	NGCSY	-0.00227303
887	SSADY	-0.00227342
888	FGCSG	-0.00227364
889	SSPQV	-0.00227371
890	ISPSM	-0.00227382
891	IDPSV	-0.00227382
892	PGCAV	-0.002274
893	HSFSG	-0.00227408
894	NGCSI	-0.00227426
895	AGFQV	-0.00227431
896	AGFDV	-0.00227442
897	PCCMV	-0.00227449
898	GAFGV	-0.00227494
899	VCFGV	-0.00227495
900	MGCTV	-0.00227508
901	SSPDY	-0.0022751
902	SGPDL	-0.00227517
903	AGCMY	-0.00227539
904	ASPTM	-0.00227539
905	YGCSI	-0.00227547
906	GDFSL	-0.00227549
907	IGPSF	-0.00227567
908	ATFGL	-0.00227574
909	GDPSY	-0.00227612
910	ISCDV	-0.00227629
911	QGCGV	-0.00227653
912	MSCYG	-0.00227689
913	SGCGL	-0.00227712
914	SGCMI	-0.00227721
915	ISPDV	-0.00227789
916	SGASM	-0.00227814
917	SSPQF	-0.00227827
918	AGYSV	-0.00227876
919	AGCDY	-0.0022792
920	HGPTV	-0.00227937
921	TSPAV	-0.00227944
922	HGCSA	-0.00227965
923	NAPSV	-0.00227982
924	YTCMG	-0.00227986
925	ESISV	-0.00227996
926	ADPQF	-0.00228005
927	AGCFI	-0.00228011
928	SGFAI	-0.00228039
929	HDFSV	-0.00228042
930	QGFAA	-0.0022806
931	FTCFG	-0.00228071
932	ASPTY	-0.00228073
933	AGCQY	-0.00228086
934	GGISI	-0.00228091
935	NSPSY	-0.00228145
936	IGADY	-0.00228149
937	FGCST	-0.00228149
938	PGPAV	-0.00228153
939	VGCSL	-0.0022817
940	HSFTV	-0.00228197
941	HSCMG	-0.00228208
942	NGIGL	-0.00228225
943	GDIGV	-0.00228226
944	TSIGL	-0.00228234
945	SGADF	-0.00228239
946	NSFTV	-0.00228268
947	SGPAM	-0.00228273
948	GSPSY	-0.00228274
949	SEPSL	-0.00228285
950	FSCDV	-0.00228325
951	SSPSC	-0.00228355
952	FGCSA	-0.00228357
953	PGCSY	-0.00228359
954	ASISF	-0.00228364
955	SGCEY	-0.00228377
956	SSPEM	-0.00228408
957	AGFGA	-0.00228415
958	IGCDI	-0.00228447
959	AGASM	-0.00228451
960	LGPSV	-0.00228454
961	HAAYC	-0.00228461
962	SEISV	-0.00228471
963	AGFGT	-0.00228501
964	NSPGL	-0.00228508
965	NSPSI	-0.00228514
966	AECSL	-0.00228531
967	YGCST	-0.00228551
968	TSPTV	-0.00228568
969	MSAYC	-0.00228589
970	LIFGV	-0.00228597
971	ASCAL	-0.00228605
972	YGCFT	-0.00228612
973	HAASC	-0.00228615
974	VGIGL	-0.00228615
975	MTCFG	-0.00228643
976	PGCIV	-0.00228644
977	TSPSL	-0.00228656
978	AGFGF	-0.00228698
979	ADCMV	-0.00228736
980	EEFGV	-0.00228747
981	YGCIV	-0.00228759
982	EGPAV	-0.00228814
983	MGISV	-0.00228815
984	HAISC	-0.0022884
985	AGIEF	-0.00228878
986	IECSV	-0.00228881
987	IGCYI	-0.00228902
988	AAPSC	-0.00228907
989	YGCCA	-0.00228908
990	DGPSL	-0.00228927
991	AGCNV	-0.00228928
992	AGMAV	-0.0022895
993	QGIAV	-0.00228988
994	AGFVV	-0.00228993
995	AIFAV	-0.00229008
996	SSCSY	-0.00229012
997	IGCFG	-0.00229016
998	ASCFV	-0.00229026
999	NSIGV	-0.00229045
1000	NDFSL	-0.002291
